# Supplementary material for: Reduced Crossover Interference and Increased ZMM-Independent Recombination in the Absence of Tel1/ATM
Source: PubMed Central journal article supplement (PMC4549261; doi:10.1371/journal.pgen.1005478), 2015-08-25

**A** Events within 5 kb merged

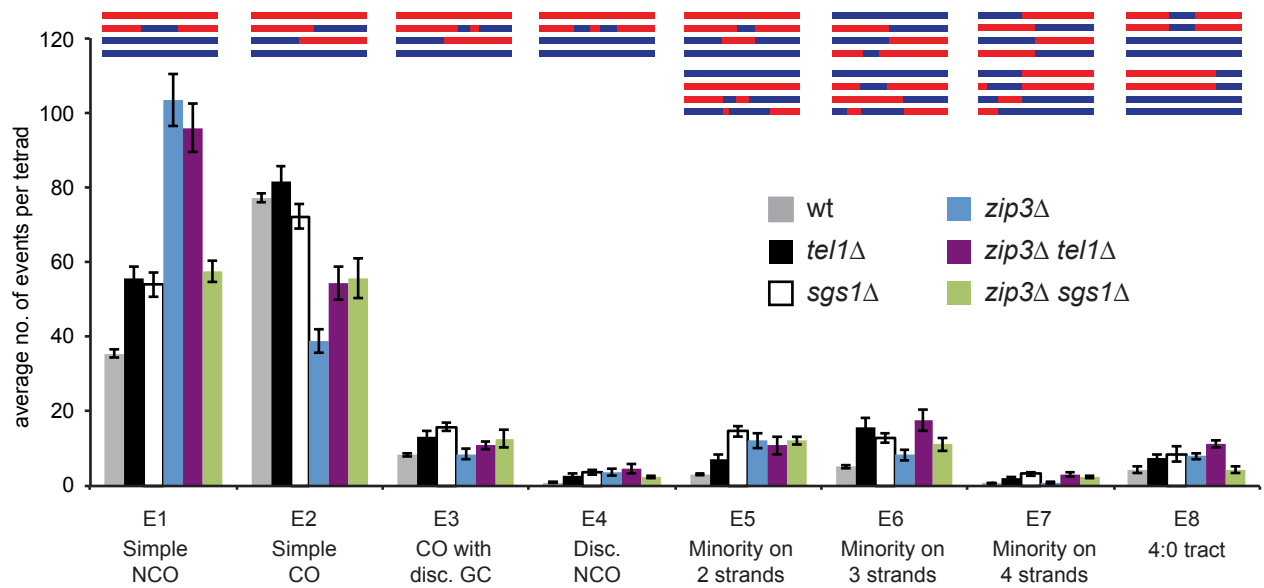

**B** Unmerged events

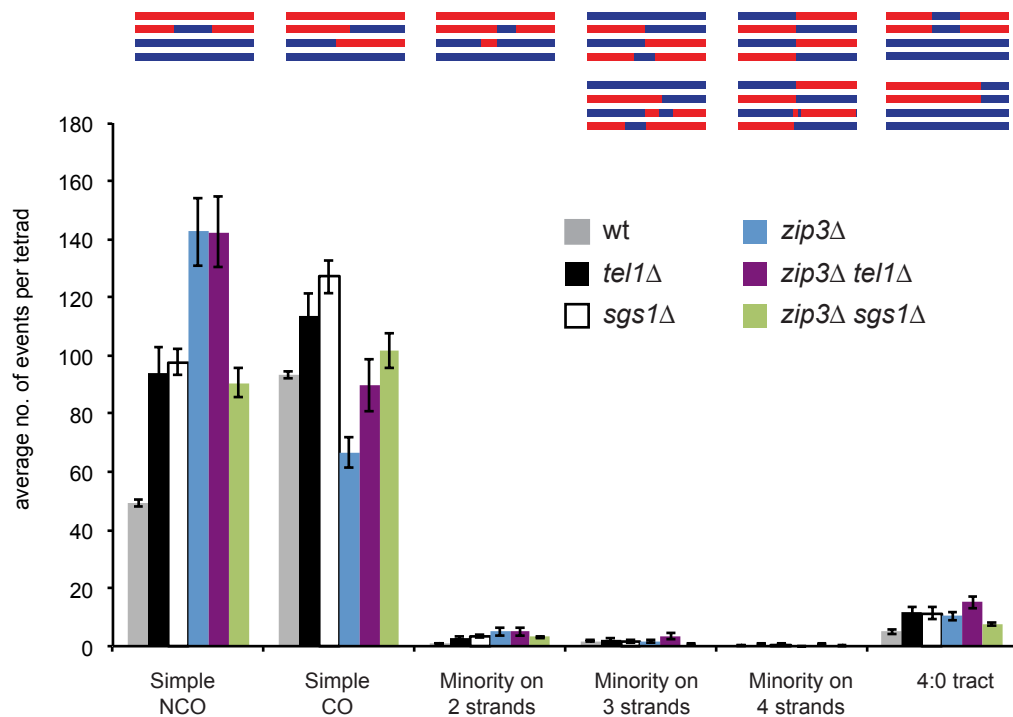

Supplement: pgen.1005478.s002.pdf [file pgen.1005478.s002.pdf]
