# Supplementary material for: Reduced Crossover Interference and Increased ZMM-Independent Recombination in the Absence of Tel1/ATM
Source: PubMed Central journal article supplement (PMC4549261; doi:10.1371/journal.pgen.1005478), 2015-08-25

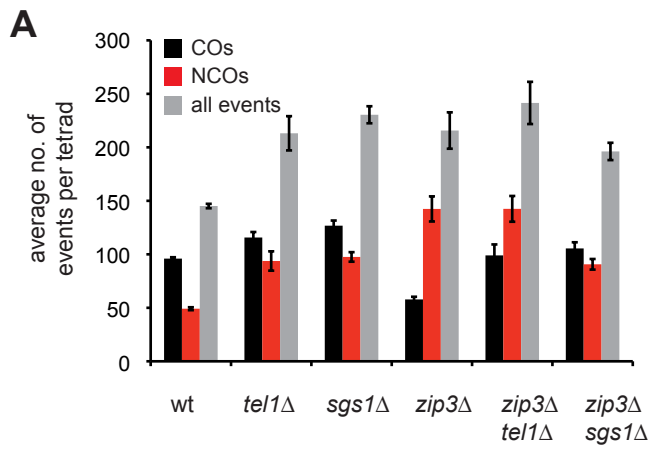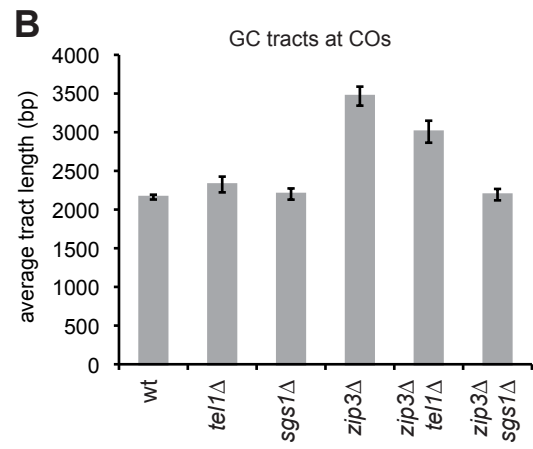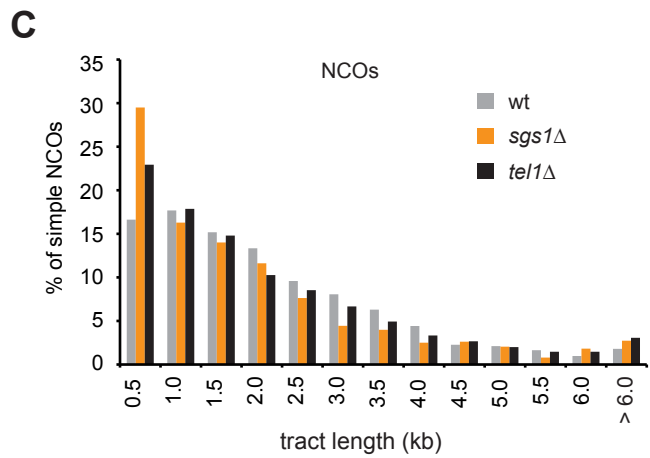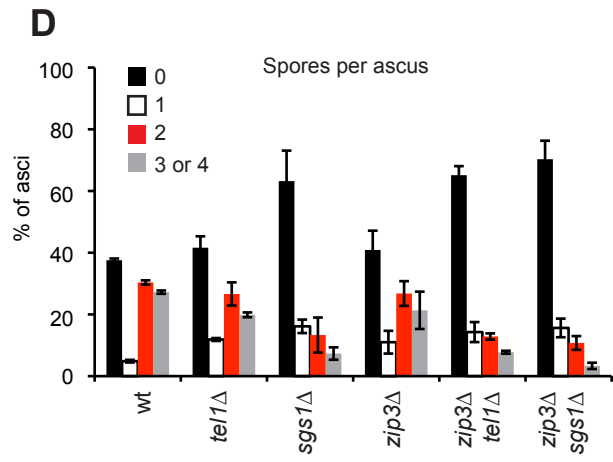

Supplement: pgen.1005478.s003.pdf [file pgen.1005478.s003.pdf]
