# Supplementary material for: Reduced Crossover Interference and Increased ZMM-Independent Recombination in the Absence of Tel1/ATM
Source: PubMed Central journal article supplement (PMC4549261; doi:10.1371/journal.pgen.1005478), 2015-08-25

**A** Zip3 foci vs. COs on chromosome IV

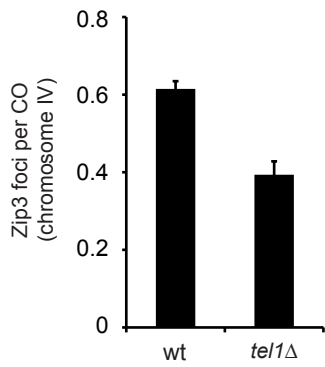

**B** Zip2 foci vs. COs on chromosome XV

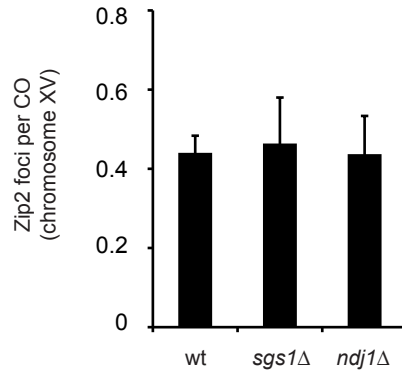

**C** COs genome wide

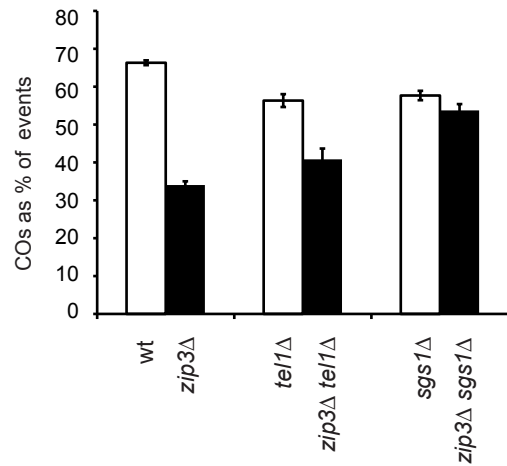

**D** CO density by chromosome

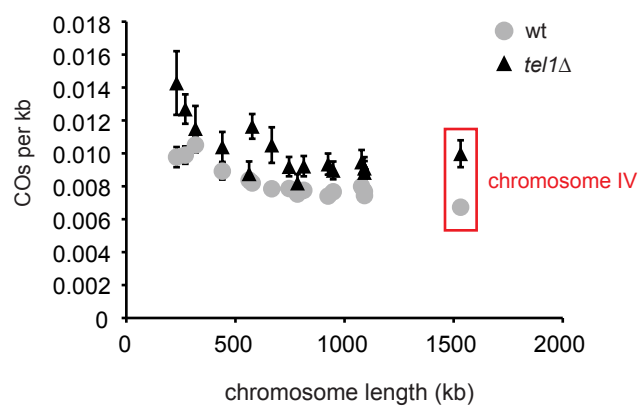

Supplement: pgen.1005478.s006.pdf [file pgen.1005478.s006.pdf]
