# Supplementary material for: Reduced Crossover Interference and Increased ZMM-Independent Recombination in the Absence of Tel1/ATM
Source: PubMed Central journal article supplement (PMC4549261; doi:10.1371/journal.pgen.1005478), 2015-08-25
Supplement: pgen.1005478.s009.pdf [file pgen.1005478.s009.pdf]

### Supporting Table S1: Yeast strains

Most experiments were performed with multiple isolates of a given genotype, as listed below. The genotype of all BR1919 strains is *leu2-3,122 his4-260 ura3-1 ade2-1 thr1-4 lys2 trp1-289*, plus additional features listed below. BR1919 diploids are fully homozygous at all loci except *MAT*. S96 and YJM789 haploid parents used to generate hybrids for recombination mapping are listed below.

The genotype of all S96 strains is *MATa ho lys5*, plus additional features as listed.

The genotype of all YJM789 strains is *MATa ho::hisG lys2 cyh*, plus additional features as listed.

| Strain names                                      | Strain number(s)             | Strain background | Relevant genotype                                                                                                                                               |
|---------------------------------------------------|------------------------------|-------------------|-----------------------------------------------------------------------------------------------------------------------------------------------------------------|
| wt S96                                            | JCF1100                      | S96               |                                                                                                                                                                 |
| wt YJM789                                         | JCF4411                      | YJM789            |                                                                                                                                                                 |
| <i>tel1Δ</i> S96                                  | yCA694, 695                  | S96               | <i>tel1Δ::KAN</i>                                                                                                                                               |
| <i>tel1Δ</i> YJM789                               | yCA703, 704                  | YJM789            | <i>tel1Δ::KAN</i>                                                                                                                                               |
| <i>sgs1Δ</i> S96                                  | SYC1120, yCA1318, 1319, 1320 | S96               | <i>sgs1Δ::KAN</i> (SYC1120), <i>sgs1Δ::NAT</i> (yCA1318, 1319, 1320)                                                                                            |
| <i>sgs1Δ</i> YJM789                               | SYC1121, YCA1321, 1322, 1323 | YJM789            | <i>sgs1Δ::KAN</i> (SYC1121), <i>sgs1Δ::NAT</i> (yCA1321, 1322, 1323)                                                                                            |
| <i>zip3Δ</i> S96                                  | yCA223, 224, 225             | S96               | <i>zip3Δ::KAN</i>                                                                                                                                               |
| <i>zip3Δ</i> YJM789                               | yCA291, 292, 293             | YJM789            | <i>zip3Δ::KAN</i>                                                                                                                                               |
| <i>msh4Δ</i> S96                                  | SYC1110                      | S96               | <i>msh4Δ::KAN</i>                                                                                                                                               |
| <i>msh4Δ</i> YJM789                               | SYC1111                      | YJM789            | <i>msh4Δ::KAN</i>                                                                                                                                               |
| <i>zip3Δ tel1Δ</i> S96                            | yCA1126, 1127                | S96               | <i>zip3Δ::KAN</i><br><i>tel1Δ::NAT</i>                                                                                                                          |
| <i>zip3Δ tel1Δ</i> YJM789                         | yCA1085, 1086                | YJM789            | <i>zip3Δ::KAN</i><br><i>tel1Δ::NAT</i>                                                                                                                          |
| <i>zip3Δ sgs1Δ</i> S96                            | yCA1130, 1131                | S96               | <i>zip3Δ::KAN</i><br><i>sgs1Δ::NAT</i>                                                                                                                          |
| <i>zip3Δ sgs1Δ</i> YJM789                         | yCA1083, 1084                | YJM789            | <i>zip3Δ::KAN</i><br><i>sgs1Δ::NAT</i>                                                                                                                          |
| wt (chr IV labeled at position 1242816)           | yCA1442, 1444                | BR1919            | <i>MATa/α leu2::tetR-mCherry-HYG/leu2::tetR-mCherry-HYG chrIV-R::tetOarray-URA3/chrIV-R::tetOarray-URA3 Zip3-GFP::KAN/Zip3-GFP::KAN</i>                         |
| <i>tel1Δ</i> (chr IV labeled at position 1242816) | yCA1443, 1445                | BR1919            | <i>MATa/α leu2::tetR-mCherry-HYG/leu2::tetR-mCherry-HYG chrIV-R::tetOarray-URA3/chrIV-R::tetOarray-URA3 Zip3-GFP::KAN/Zip3-GFP::KAN tel1Δ::NAT/tel1Δ::NAT</i>   |
| wt (chr XIV labeled at position 743894)           | yCA1076                      | BR1919            | <i>MATa/α leu2::tetR-mCherry-HYG/leu2::tetR-mCherry-HYG chrXIV-R::tetOarray-THR1/chrXIV-R::tetOarray-THR1 Zip3-GFP::KAN/Zip3-GFP::KAN</i>                       |
| <i>tel1Δ</i> (chr XIV labeled at position 743894) | yCA1077                      | BR1919            | <i>MATa/α leu2::tetR-mCherry-HYG/leu2::tetR-mCherry-HYG chrXIV-R::tetOarray-THR1/chrXIV-R::tetOarray-THR1 Zip3-GFP::KAN/Zip3-GFP::KAN tel1Δ::NAT/tel1Δ::NAT</i> |

| Strain names                | Strain number(s) | Strain background | Relevant genotype                                               |
|-----------------------------|------------------|-------------------|-----------------------------------------------------------------|
| <i>zip1</i> Δ               | yCA1264          | BR1919            | <i>MATa/α zip1Δ::LYS2/zip1Δ::LYS2</i>                           |
| <i>zip1</i> Δ <i>sgs1</i> Δ | yCA1260          | BR1919            | <i>MATa/α zip1Δ::LYS2/zip1Δ::LYS2<br/>sgs1Δ::KAN/sgs1Δ::KAN</i> |
| <i>zip1</i> Δ <i>tel1</i> Δ | yCA1262          | BR1919            | <i>MATa/α zip1Δ::LYS2/zip1Δ::LYS2<br/>tel1Δ::NAT/tel1Δ::NAT</i> |
