# Supplementary material for: Reduced Crossover Interference and Increased ZMM-Independent Recombination in the Absence of Tel1/ATM
Source: PubMed Central journal article supplement (PMC4549261; doi:10.1371/journal.pgen.1005478), 2015-08-25
Supplement: pgen.1005478.s010.pdf [file pgen.1005478.s010.pdf]

## Supporting Table S2: Tetrads genotyped

Data for *tel1Δ*, *zip3Δ tel1Δ*, and two out of six *zip3Δ sgs1Δ* tetrads have been deposited in NIH Sequence Read Archive under accession number SRP044001. Data for wild type, *sgs1Δ*, *zip3Δ*, *msh4Δ*, and four out of six *sgs1Δ zip3Δ* tetrads were previously deposited under accession numbers SRP028549 (wild type) and SRP041214 (all other strains).

| Genotype     | Tetrads sequenced with high coverage                                                         | Tetrads sequenced with lower coverage   | Tetrads genotyped by microarray                                                                                     | Notes                                                                                                |
|--------------|----------------------------------------------------------------------------------------------|-----------------------------------------|---------------------------------------------------------------------------------------------------------------------|------------------------------------------------------------------------------------------------------|
| wildtype     | wtx29<br>wtx30<br>wtx46<br>wtx63<br>wtx64<br>wtx65                                           |                                         |                                                                                                                     | Data from 46 tetrads genotyped by high-density tiling array by Mancera et al. (2008) were also used. |
| <i>tel1Δ</i> | tel1x6<br>tel1x7<br>tel1x10<br>tel1x11<br>tel1x12<br>tel1x15<br>tel1x16<br>tel1x18           | tel1x5<br>tel1x14<br>tel1x17<br>tel1x19 | tel1x2<br>tel1x13                                                                                                   |                                                                                                      |
| <i>sgs1Δ</i> | sgs1x2<br>sgs1x7<br>sgs1x8<br>sgs1x30<br>sgs1x32<br>sgs1x33<br>sgs1x34<br>sgs1x35<br>sgs1x36 | sgs1x29<br>sgs1x31                      | sgs1x3<br>sgs1x9                                                                                                    |                                                                                                      |
| <i>zip3Δ</i> | zip3x262<br>zip3x265<br>zip3x268<br>zip3x274<br>zip3x276<br>zip3x289<br>zip3x295             | zip3x269<br>zip3x271<br>zip3x272        | zip3x251, 254, 255, 256,<br>257, 264, 266, 273, 275,<br>277, 278, 290, 292, 296,<br>297, 298, 299, 300, 301,<br>303 |                                                                                                      |

| Genotype                                     | Tetrads sequenced with high coverage                                               | Tetrads sequenced with lower coverage | Tetrads genotyped by microarray | Notes                                                                                               |
|----------------------------------------------|------------------------------------------------------------------------------------|---------------------------------------|---------------------------------|-----------------------------------------------------------------------------------------------------|
| <i>msh4</i> $\Delta$                         | msh4x1<br>msh4x2<br>msh4x3<br>msh4x4<br>msh4x5<br>msh4x6<br>msh4x8                 |                                       |                                 | Data from 5 tetrads genotyped by high-density tiling array by Mancera et al. (2008) were also used. |
| <i>zip3</i> $\Delta$<br><i>tel1</i> $\Delta$ | zip3tel1x1<br>zip3tel1x2<br>zip3tel1x3<br>zip3tel1x5<br>zip3tel1x14<br>zip3tel1x19 |                                       |                                 |                                                                                                     |
| <i>zip3</i> $\Delta$<br><i>sgs1</i> $\Delta$ | zip3sgs1x2<br>zip3sgs1x4<br>zip3sgs1x5<br>zip3sgs1x7<br>zip3sgs1x8<br>zip3sgs1x10  |                                       |                                 |                                                                                                     |
